# Supplementary material
Source: PubMed Central journal article supplement (PMC6591734)

**A**

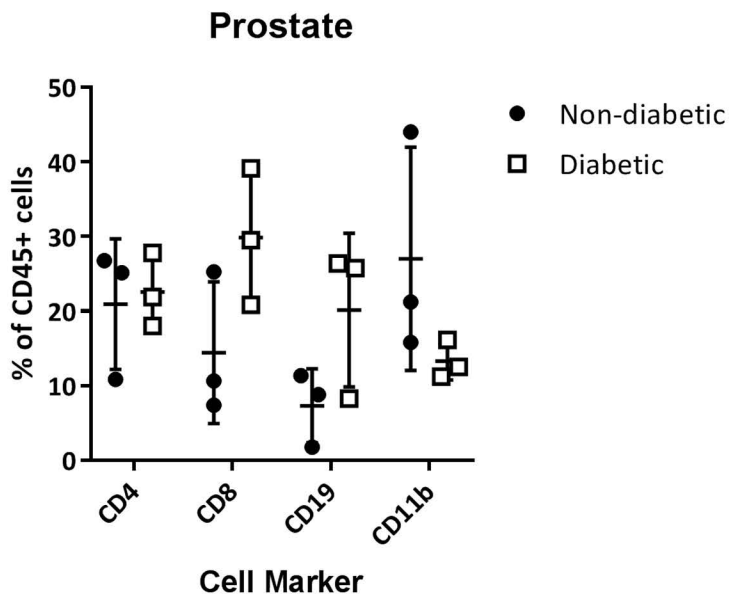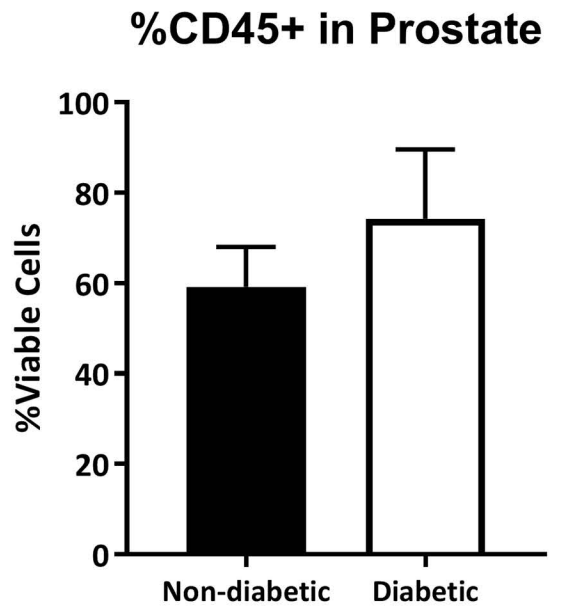

**B**

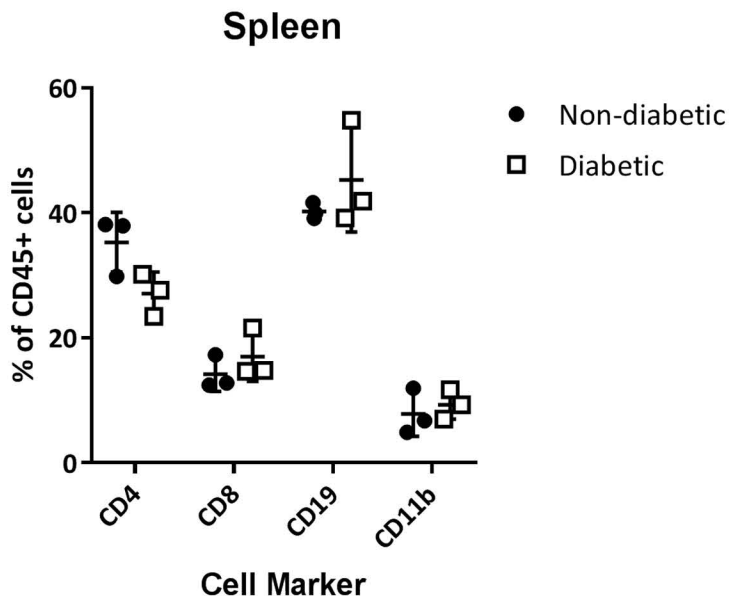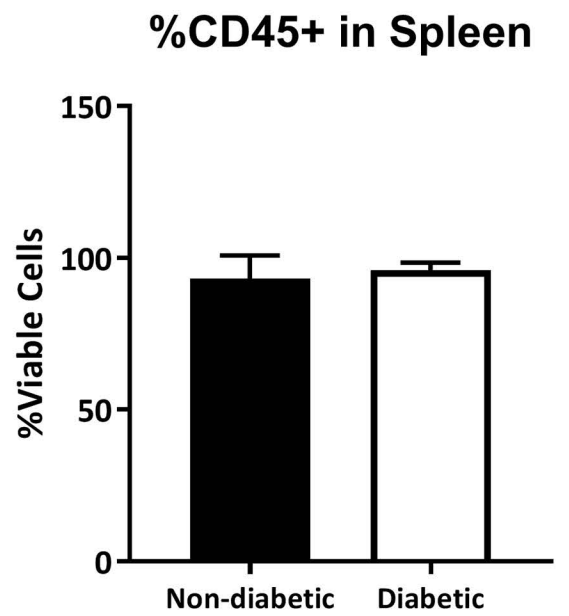

**A**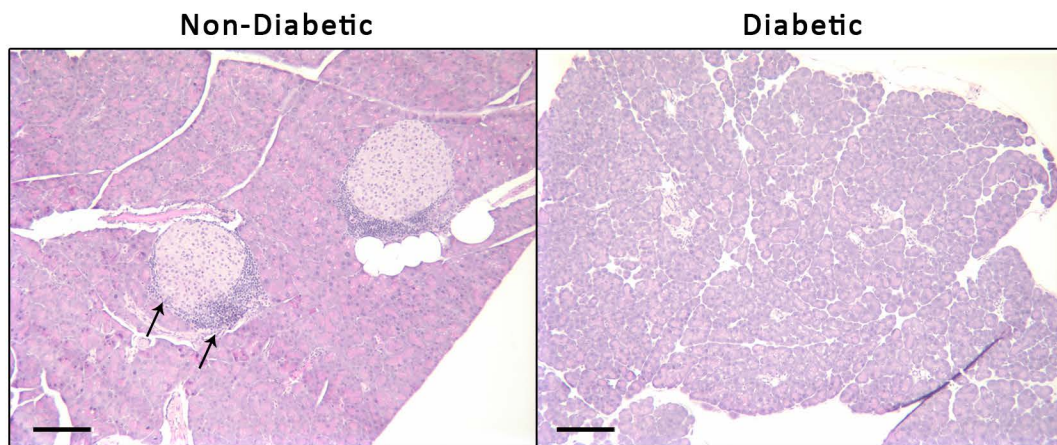**B**

| Structure        | Non-Diabetic | Diabetic | Diabetic w/PIN |
|------------------|--------------|----------|----------------|
| Islets           | 2/3+         | 0/1      | 0/1            |
| - Inflammation   | 3+           | 1+       | 1-2+           |
| Acini:           |              |          |                |
| - Nuclear Atypia | +            | ++       | +++            |
| - Vacuoles       | +            | ++       | +++            |
| Ducts            | +            | ++       | +++            |

A

| Comparison | Upregulated Genes | Upregulated Genes | Downregulated Genes | Downregulated Genes |
|------------|-------------------|-------------------|---------------------|---------------------|
| Dp Vs. ND  | Ang3              | Igtp              | 1700040F15Rik       | Hhip                |
|            | Ano9              | ligp1             | 240141K09Rik        | Hspb6               |
|            | Casp12            | Inmt              | Acta1               | Igfbp2              |
|            | CCL12             | Irf7              | Actg2               | Itga7               |
|            | CCL3              | Irgm2             | Akap12              | Olfr1168            |
|            | Cd7               | Mark1             | Ankrd1              | Pi15                |
|            | Cd8a              | Nkg7              | Cav1                | Plcb4               |
|            | Cse1l             | Pnliprp2          | Ckb                 | Prune2              |
|            | Defb1             | Rtp4              | Cog4                | Rbpms2              |
|            | Dsc1              | Sectm1b           | Dmpk                | Sh3bgr              |
|            | Ebf4              | Sh3bp2            | Eppin               | Sorbs1              |
|            | Echdc1            | Slc39a4           | Flnc                | Synpo2              |
|            | Ets2              | Tgtp2             | Gm15319             | Tgfb3               |
|            | Gm12185           | Tnfsf10           | Gm20809             | Tinagl1             |
|            | Gm12250           | Ugt2b34           | Gm20826             | Tpm2                |
|            | Gzma              | Vtcn1             | Gm21119             | Uts2b               |
| Gzmb       | Zfp143            | Gm21739           |                     |                     |

B

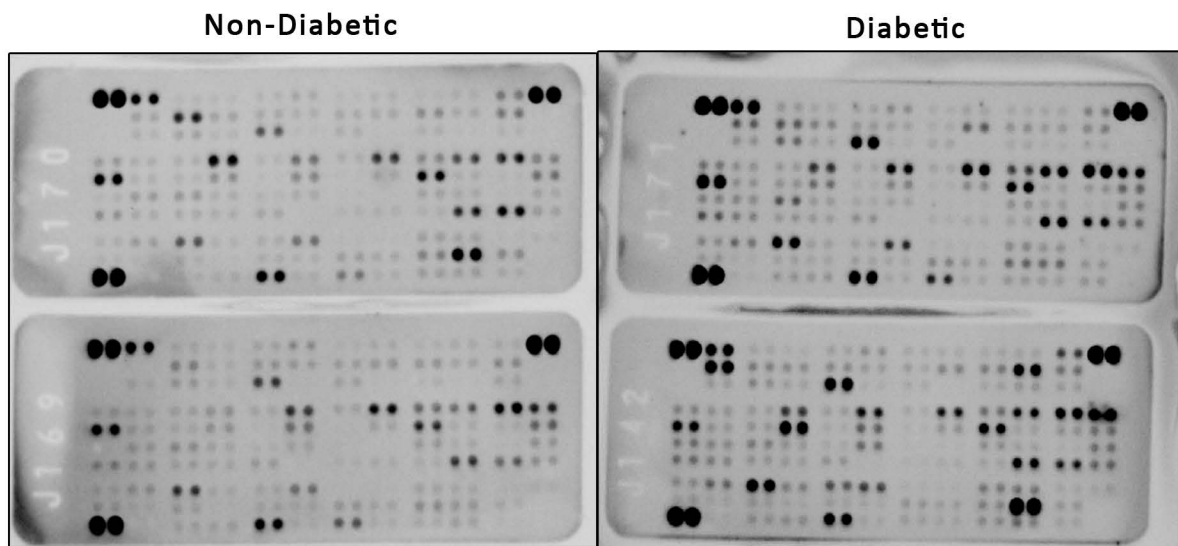

Supplement: NIHMS1021148-supplement-Supp_figS1-4.pdf [file NIHMS1021148-supplement-Supp_figS1-4.pdf]
